# Supplementary material for: Ligand effect on surface reconstruction in CdSe quantum dots driven by electron injection in electroluminescence processes
Source: Royal Society of Chemistry journal article supplement (doi:10.1039/d4nr02981j), 2024-01-01
Supplement: d4nr02981j1.pdf [file d4nr02981j1.pdf]

## Electronic Supplementary Information

### **Ligand effect on surface reconstructions in CdSe quantum dots driven by electron injection in electroluminescent processes**

Xiangyu Huo,<sup>a</sup> Yujuan Xie,<sup>b</sup> Xian Wang,<sup>c</sup> Li Zhang <sup>a</sup> and Mingli Yang <sup>\*a</sup>

<sup>a</sup> Institute of Atomic and Molecular Physics, Sichuan University, Chengdu 610065, China

<sup>b</sup> School of Science, Westlake University, Hangzhou 310030, China

<sup>c</sup> School of Chemistry, Chemical Engineering and Biotechnology, Nanyang Technological University, 21 Nanyang Link 637371, Singapore

\* E-mail: myang@scu.edu.cn

**Table S1** Bondlengths of (CdSe)<sub>6</sub> in this work and other studies.

| Bondlengths (Å) |             | References |
|-----------------|-------------|------------|
| Facial          | Interfacial |            |
| 2.596–2.597     | 2.818       | This study |
| 2.626           | 2.857       | 1          |
| 2.732 (average) |             | 2          |
| 2.698–2.863     |             | 3          |

**Table S2** Selected bondlengths (in Å) of (CdSe)<sub>6</sub>-NH<sub>2</sub>CH<sub>3</sub>, (CdSe)<sub>6</sub>-CdCl<sub>2</sub> and (CdSe)<sub>6</sub>-SCH<sub>3</sub>.

|                                                      |                  |                   |                   |                   |
|------------------------------------------------------|------------------|-------------------|-------------------|-------------------|
|                                                      | D <sub>6-9</sub> | D <sub>6-11</sub> | D <sub>6-12</sub> | D <sub>6-29</sub> |
| (CdSe) <sub>6</sub> -NH <sub>2</sub> CH <sub>3</sub> | 2.747            | 2.692             | 2.717             | 2.405             |
|                                                      | D <sub>8-4</sub> | D <sub>8-2</sub>  | D <sub>8-1</sub>  | D <sub>8-7</sub>  |
| (CdSe) <sub>6</sub> -CdCl <sub>2</sub>               | 2.747            | 2.677             | 2.648             | 2.772             |
|                                                      | D <sub>4-7</sub> | D <sub>4-10</sub> | D <sub>4-11</sub> | D <sub>4-27</sub> |
| (CdSe) <sub>6</sub> -SCH <sub>3</sub>                | 2.742            | 2.840             | 2.844             | 2.447             |

**Table S3** Amounts of atomic net charge and their changes (in e) of (CdSe)<sub>6</sub>-NH<sub>2</sub>CH<sub>3</sub> and (CdSe)<sub>6</sub>-CdCl<sub>2</sub> before and after electron injection.

| Atomic numbering | Element | (CdSe) <sub>6</sub> -NH <sub>2</sub> CH <sub>3</sub> |        |        | Element | (CdSe) <sub>6</sub> -CdCl <sub>2</sub> |        |        |
|------------------|---------|------------------------------------------------------|--------|--------|---------|----------------------------------------|--------|--------|
|                  |         | Before                                               | After  | Change |         | Before                                 | After  | Change |
| 1                | Cd      | 0.291                                                | 0.284  | 0.007  | Cd      | 0.304                                  | 0.282  | 0.023  |
| 2                | Cd      | 0.289                                                | 0.296  | -0.007 | Cd      | 0.306                                  | 0.273  | 0.033  |
| 3                | Cd      | 0.288                                                | 0.290  | -0.002 | Cd      | 0.312                                  | 0.287  | 0.025  |
| 4                | Cd      | 0.292                                                | 0.262  | 0.030  | Cd      | 0.315                                  | 0.267  | 0.048  |
| 5                | Cd      | 0.292                                                | 0.258  | 0.034  | Cd      | 0.311                                  | 0.283  | 0.028  |
| 6                | Cd      | 0.298                                                | 0.015  | 0.283  | Cd      | 0.312                                  | 0.280  | 0.031  |
| 7                | Se      | -0.121                                               | -0.115 | -0.006 | Cd      | 0.270                                  | 0.211  | 0.059  |
| 8                | Se      | -0.120                                               | -0.132 | 0.012  | Se      | -0.226                                 | -0.283 | 0.057  |
| 9                | Se      | -0.127                                               | -0.239 | 0.112  | Se      | -0.101                                 | -0.160 | 0.059  |
| 10               | Se      | -0.125                                               | -0.143 | 0.018  | Se      | -0.102                                 | -0.116 | 0.014  |
| 11               | Se      | -0.140                                               | -0.129 | -0.011 | Se      | -0.076                                 | -0.147 | 0.071  |
| 12               | Se      | -0.135                                               | -0.143 | 0.009  | Se      | -0.099                                 | -0.127 | 0.027  |
| 13               | H       | -0.090                                               | -0.123 | 0.033  | Se      | -0.105                                 | -0.161 | 0.056  |
| 14               | H       | -0.101                                               | -0.119 | 0.018  | H       | -0.099                                 | -0.153 | 0.054  |
| 15               | H       | -0.096                                               | -0.107 | 0.011  | H       | -0.101                                 | -0.142 | 0.041  |
| 16               | H       | -0.089                                               | -0.122 | 0.033  | H       | -0.098                                 | -0.130 | 0.032  |
| 17               | H       | -0.094                                               | -0.145 | 0.051  | H       | -0.099                                 | -0.142 | 0.043  |
| 18               | H       | -0.102                                               | -0.129 | 0.027  | H       | -0.096                                 | -0.132 | 0.036  |
| 19               | H       | -0.118                                               | -0.182 | 0.063  | H       | -0.100                                 | -0.125 | 0.024  |
| 20               | H       | -0.116                                               | -0.118 | 0.002  | H       | -0.077                                 | -0.106 | 0.030  |
| 21               | H       | -0.116                                               | -0.156 | 0.040  | H       | -0.072                                 | -0.085 | 0.012  |
| 22               | H       | -0.119                                               | -0.149 | 0.030  | H       | -0.074                                 | -0.090 | 0.016  |
| 23               | H       | -0.117                                               | -0.141 | 0.024  | H       | -0.076                                 | -0.120 | 0.044  |
| 24               | H       | 0.121                                                | 0.092  | 0.028  | H       | -0.075                                 | -0.081 | 0.006  |
| 25               | H       | 0.120                                                | 0.096  | 0.024  | Cl      | -0.235                                 | -0.292 | 0.057  |
| 26               | H       | 0.043                                                | 0.042  | 0.002  | Cl      | -0.219                                 | -0.292 | 0.073  |
| 27               | H       | 0.047                                                | 0.024  | 0.023  |         |                                        |        |        |
| 28               | H       | 0.051                                                | 0.035  | 0.017  |         |                                        |        |        |
| 29               | N       | -0.146                                               | -0.224 | 0.077  |         |                                        |        |        |
| 30               | C       | -0.059                                               | -0.077 | 0.018  |         |                                        |        |        |

**Table S4** Contributions (in %) of individual atoms to the in-gap states in (CdSe)<sub>6</sub>-NH<sub>2</sub>CH<sub>3</sub>.

|           | Cd 5s <sup>a</sup> | Se 4p <sup>b</sup> | Cd 5s <sup>c</sup> |
|-----------|--------------------|--------------------|--------------------|
| Spin up   | 6.11               | 28.29              | 59.48              |
| Spin down | 5.15               | 31.75              | 57.43              |

<sup>a</sup> Contributions from five Cd atoms labeled as 1–5 (see Fig. 1). <sup>b</sup> From six Se atoms labeled as 7–12. <sup>c</sup> From one Cd atom labeled as 6.

**Table S5** Amounts of atomic net charge and their changes (in e) of (CdSe)<sub>6</sub>-PH<sub>3</sub> and (CdSe)<sub>6</sub>-InCl<sub>3</sub> before and after electron injection.

| Atomic numbering | Element | (CdSe) <sub>6</sub> -PH <sub>3</sub> |        |        | Element | (CdSe) <sub>6</sub> -InCl <sub>3</sub> |        |        |
|------------------|---------|--------------------------------------|--------|--------|---------|----------------------------------------|--------|--------|
|                  |         | Before                               | After  | Change |         | Before                                 | After  | Change |
| 1                | Cd      | 0.296                                | 0.272  | 0.024  | Cd      | 0.319                                  | 0.246  | 0.073  |
| 2                | Cd      | 0.296                                | 0.261  | 0.035  | Cd      | 0.311                                  | 0.277  | 0.034  |
| 3                | Cd      | 0.245                                | 0.017  | 0.228  | Cd      | 0.319                                  | 0.270  | 0.050  |
| 4                | Cd      | 0.294                                | 0.284  | 0.011  | Cd      | 0.312                                  | 0.282  | 0.030  |
| 5                | Cd      | 0.291                                | 0.274  | 0.017  | Cd      | 0.305                                  | 0.267  | 0.038  |
| 6                | Cd      | 0.291                                | 0.271  | 0.020  | Cd      | 0.312                                  | 0.274  | 0.038  |
| 7                | Se      | -0.121                               | -0.144 | 0.022  | Se      | -0.093                                 | -0.096 | 0.003  |
| 8                | Se      | -0.131                               | -0.135 | 0.004  | Se      | -0.201                                 | -0.227 | 0.027  |
| 9                | Se      | -0.131                               | -0.127 | -0.004 | Se      | -0.095                                 | -0.141 | 0.046  |
| 10               | Se      | -0.119                               | -0.131 | 0.013  | Se      | -0.080                                 | -0.152 | 0.072  |
| 11               | Se      | -0.119                               | -0.148 | 0.029  | Se      | -0.085                                 | -0.102 | 0.016  |
| 12               | Se      | -0.127                               | -0.180 | 0.053  | Se      | -0.080                                 | -0.149 | 0.068  |
| 13               | P       | 0.126                                | 0.036  | 0.090  | In      | 0.170                                  | 0.105  | 0.064  |
| 14               | H       | 0.011                                | -0.013 | 0.023  | Cl      | -0.162                                 | -0.231 | 0.069  |
| 15               | H       | 0.011                                | -0.012 | 0.023  | Cl      | -0.162                                 | -0.179 | 0.017  |
| 16               | H       | 0.012                                | -0.012 | 0.024  | Cl      | -0.156                                 | -0.222 | 0.066  |
| 17               | H       | -0.098                               | -0.128 | 0.030  | H       | -0.088                                 | -0.115 | 0.027  |
| 18               | H       | -0.092                               | -0.149 | 0.057  | H       | -0.102                                 | -0.119 | 0.017  |
| 19               | H       | -0.097                               | -0.122 | 0.024  | H       | -0.088                                 | -0.125 | 0.038  |
| 20               | H       | -0.088                               | -0.141 | 0.053  | H       | -0.098                                 | -0.132 | 0.034  |
| 21               | H       | -0.087                               | -0.130 | 0.043  | H       | -0.098                                 | -0.142 | 0.044  |
| 22               | H       | -0.091                               | -0.142 | 0.051  | H       | -0.098                                 | -0.106 | 0.008  |
| 23               | H       | -0.114                               | -0.154 | 0.040  | H       | -0.074                                 | -0.107 | 0.034  |
| 24               | H       | -0.115                               | -0.133 | 0.018  | H       | -0.074                                 | -0.089 | 0.014  |
| 25               | H       | -0.115                               | -0.145 | 0.030  | H       | -0.069                                 | -0.064 | -0.005 |
| 26               | H       | -0.113                               | -0.117 | 0.004  | H       | -0.076                                 | -0.148 | 0.072  |
| 27               | H       | -0.116                               | -0.152 | 0.036  | H       | -0.069                                 | -0.073 | 0.004  |

**Table S6** Contributions (in %) of individual atoms to the in-gap states in  $(\text{CdSe})_6\text{-PH}_3$ .

|           | Cd 5s <sup>a</sup> | Se 4p <sup>b</sup> | Cd* 5s <sup>c</sup> |
|-----------|--------------------|--------------------|---------------------|
| Spin up   | 7.32               | 28.80              | 58.52               |
| Spin down | 8.49               | 25.21              | 60.53               |

<sup>a</sup> Contributions from five Cd atoms labeled as 1, 3, and 4–6 (see Fig. S8). <sup>b</sup> From six Se atoms labeled as 7–12. <sup>c</sup> From one Cd atom labeled as 3.

**Table S7** Changes of atomic net charge (in e) of  $(\text{CdSe})_{13}\text{-NH}_2\text{CH}_3$  before and after electron injection.

| Atom numbering | Element | Change | Atom numbering | Element | Change |
|----------------|---------|--------|----------------|---------|--------|
| 1              | Se      | -0.001 | 29             | H       | 0.005  |
| 2              | Se      | 0.002  | 30             | H       | 0.012  |
| 3              | Se      | 0.001  | 31             | H       | 0.002  |
| 4              | Se      | 0.022  | 32             | H       | 0.015  |
| 5              | Se      | -0.029 | 33             | H       | -0.007 |
| 6              | Se      | 0.012  | 34             | H       | 0.014  |
| 7              | Se      | 0.008  | 35             | H       | -0.017 |
| 8              | Se      | 0.007  | 36             | H       | 0.016  |
| 9              | Se      | -0.008 | 37             | H       | 0.013  |
| 10             | Se      | -0.023 | 38             | H       | 0.016  |
| 11             | Se      | 0.018  | 39             | H       | 0.011  |
| 12             | Se      | -0.008 | 40             | H       | 0.049  |
| 13             | Se      | 0.018  | 41             | H       | -0.009 |
| 14             | Cd      | 0.016  | 42             | H       | 0.000  |
| 15             | Cd      | 0.047  | 43             | H       | 0.012  |
| 16             | Cd      | 0.010  | 44             | H       | 0.034  |
| 17             | Cd      | -0.003 | 45             | H       | -0.008 |
| 18             | Cd      | 0.033  | 46             | H       | 0.009  |
| 19             | Cd      | 0.058  | 47             | H       | 0.018  |
| 20             | Cd      | 0.085  | 48             | H       | 0.013  |
| 21             | Cd      | 0.018  | 49             | H       | 0.012  |
| 22             | Cd      | 0.038  | 50             | H       | 0.010  |
| 23             | Cd      | 0.033  | 51             | H       | 0.004  |
| 24             | Cd      | 0.069  | 52             | H       | -0.001 |
| 25             | Cd      | 0.024  | 53             | H       | 0.012  |
| 26             | Cd      | 0.290  | 54             | H       | 0.012  |
| 27             | C       | 0.004  | 55             | H       | 0.017  |
| 28             | N       | -0.011 | 56             | H       | 0.007  |



**Table S8** Changes of atomic net charge (in e) of (CdSe)<sub>6</sub>-6NH<sub>2</sub>CH<sub>3</sub> before and after electron injection.

| Atom numbering | Element | Change | Atom numbering | Element | Change |
|----------------|---------|--------|----------------|---------|--------|
| 1              | Cd      | 0.051  | 49             | C       | 0.000  |
| 2              | Cd      | 0.071  | 50             | C       | -0.002 |
| 3              | Cd      | 0.053  | 51             | C       | -0.002 |
| 4              | Cd      | 0.311  | 52             | C       | -0.001 |
| 5              | Cd      | 0.072  | 53             | C       | -0.001 |
| 6              | Cd      | 0.326  | 54             | C       | -0.002 |
| 7              | Se      | 0.025  | 55             | H       | 0.006  |
| 8              | Se      | 0.010  | 56             | H       | -0.003 |
| 9              | Se      | 0.002  | 57             | H       | 0.009  |
| 10             | Se      | 0.004  | 58             | H       | 0.010  |
| 11             | Se      | -0.054 | 59             | H       | 0.001  |
| 12             | Se      | 0.008  | 60             | N       | 0.001  |
| 13             | H       | -0.004 | 61             | C       | -0.002 |
| 14             | H       | 0.004  | 62             | H       | 0.006  |
| 15             | H       | -0.003 | 63             | H       | -0.002 |
| 16             | H       | 0.015  | 64             | H       | 0.007  |
| 17             | H       | -0.007 | 65             | H       | 0.008  |
| 18             | H       | 0.007  | 66             | H       | 0.001  |
| 19             | H       | -0.007 | 67             | N       | 0.002  |
| 20             | H       | 0.011  | 68             | C       | -0.002 |
| 21             | H       | 0.014  | 69             | H       | 0.008  |
| 22             | H       | -0.011 | 70             | H       | 0.000  |
| 23             | H       | 0.003  | 71             | H       | 0.007  |
| 24             | H       | 0.001  | 72             | H       | 0.013  |
| 25             | H       | 0.002  | 73             | H       | 0.001  |
| 26             | H       | 0.011  | 74             | N       | 0.002  |
| 27             | H       | -0.002 | 75             | C       | -0.004 |
| 28             | H       | 0.002  | 76             | H       | -0.029 |
| 29             | H       | 0.001  | 77             | H       | 0.038  |
| 30             | H       | 0.002  | 78             | H       | -0.032 |
| 31             | H       | 0.011  | 79             | H       | 0.005  |
| 32             | H       | -0.001 | 80             | H       | 0.019  |
| 33             | H       | 0.004  | 81             | N       | 0.005  |
| 34             | H       | 0.001  | 82             | C       | 0.002  |
| 35             | H       | 0.004  | 83             | H       | 0.009  |
| 36             | H       | 0.012  | 84             | H       | -0.001 |
| 37             | H       | -0.005 | 85             | H       | 0.007  |
| 38             | H       | 0.003  | 86             | H       | 0.007  |
| 39             | H       | 0.000  | 87             | H       | -0.020 |
| 40             | H       | 0.003  | 88             | N       | 0.002  |
| 41             | H       | 0.011  | 89             | C       | 0.010  |

|    |   |        |    |   |        |
|----|---|--------|----|---|--------|
| 42 | H | -0.002 | 90 | H | 0.008  |
| 43 | N | -0.007 | 91 | H | -0.001 |
| 44 | N | -0.011 | 92 | H | 0.006  |
| 45 | N | -0.010 | 93 | H | 0.011  |
| 46 | N | -0.007 | 94 | H | -0.021 |
| 47 | N | -0.006 | 95 | N | 0.001  |
| 48 | N | -0.008 | 96 | C | 0.009  |

---

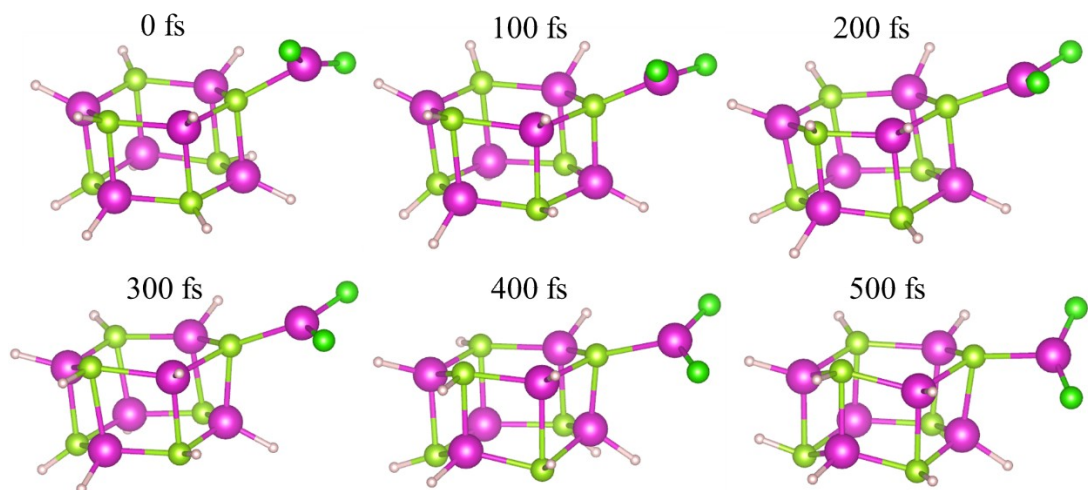

**Fig. S1** Structure variations in  $(\text{CdSe})_6\text{-CdCl}_2$  after electron injection as a function of time.

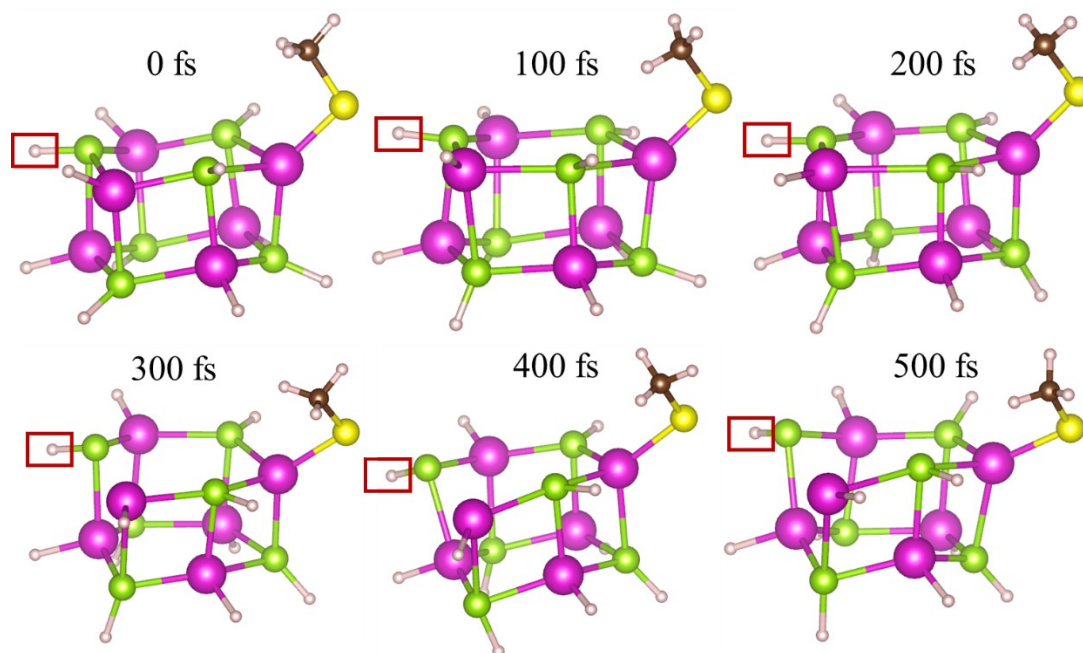

**Fig. S2** Structure variations in (CdSe)<sub>6</sub>-SCH<sub>3</sub>-H (a) after electron injection as a function of time.

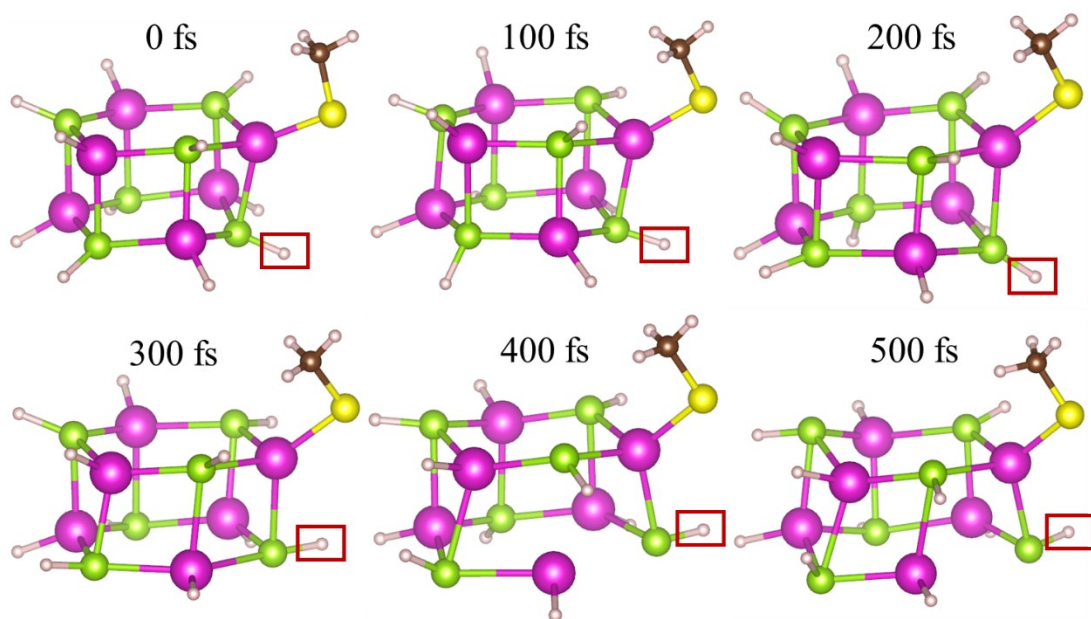

**Fig. S3** Structure variations in (CdSe)<sub>6</sub>-SCH<sub>3</sub>-H (b) after electron injection as a function of time.

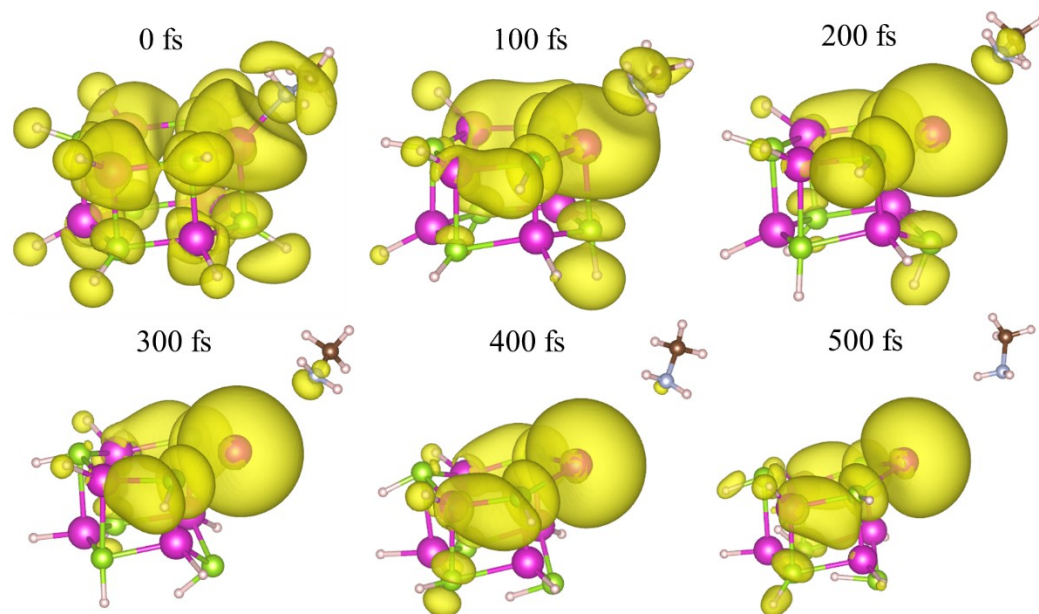

**Fig. S4** Variation of the spin-down LUMO of (CdSe)<sub>6</sub>-NH<sub>2</sub>CH<sub>3</sub> as a function of time.

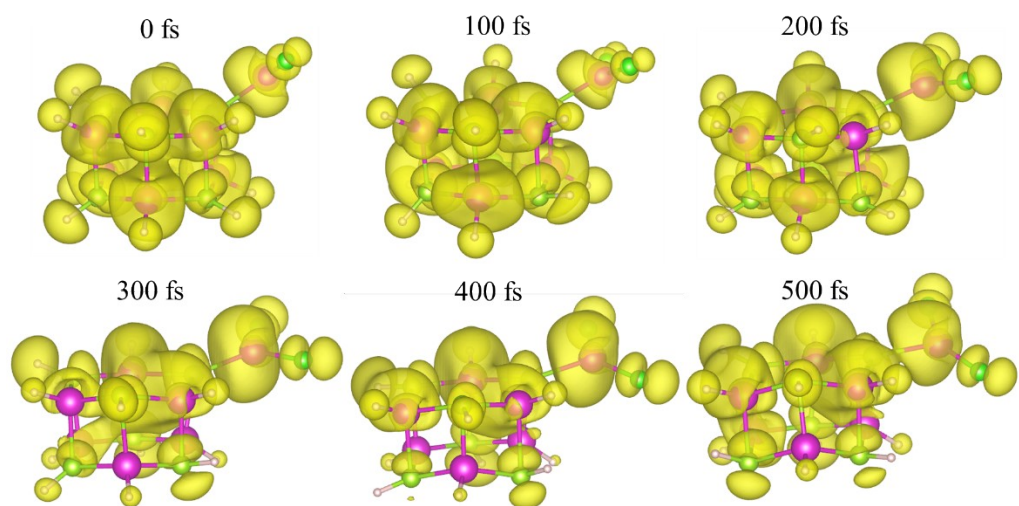

**Fig. S5** Variation of the spin-up LUMO of (CdSe)<sub>6</sub>-CdCl<sub>2</sub> as a function of time.

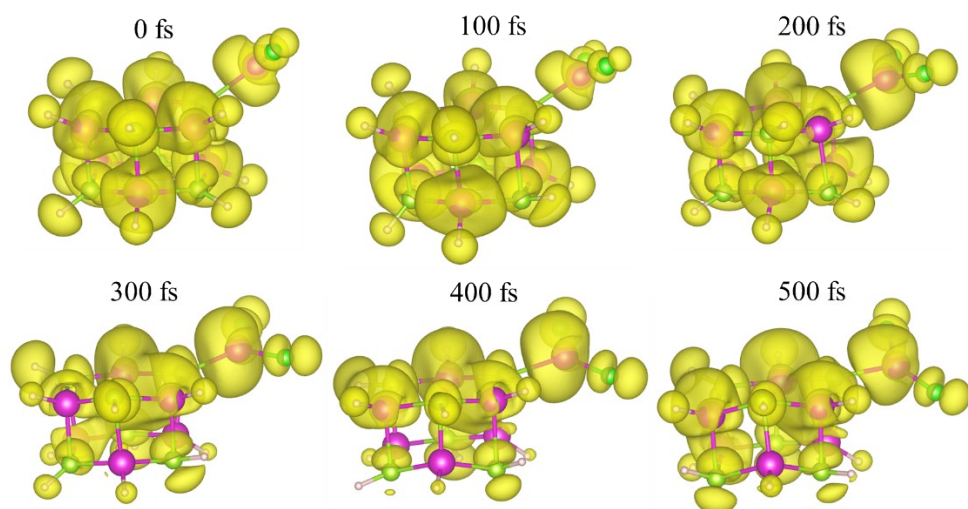

**Fig. S6** Variation of the spin-down LUMO of (CdSe)<sub>6</sub>-CdCl<sub>2</sub> as a function of time.



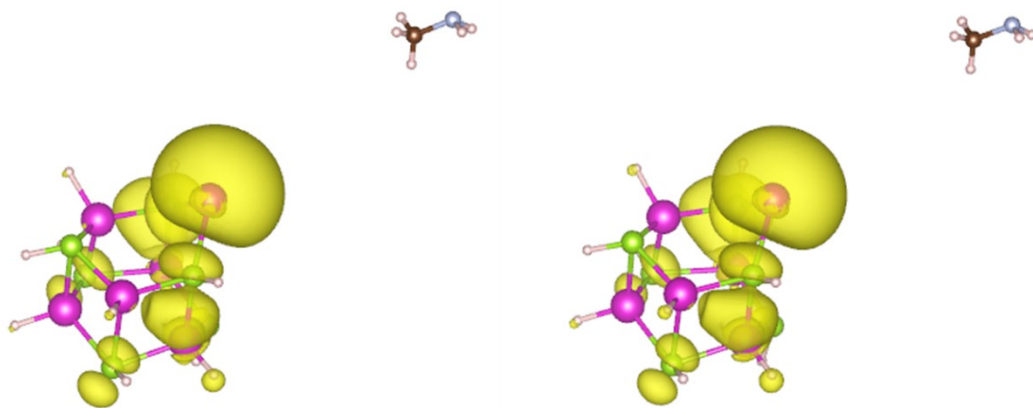

**Fig. S7** Spin-up (Left) and spin-down (Right) LUMO of (CdSe)<sub>6</sub>-NH<sub>2</sub>CH<sub>3</sub> as 1 ns.

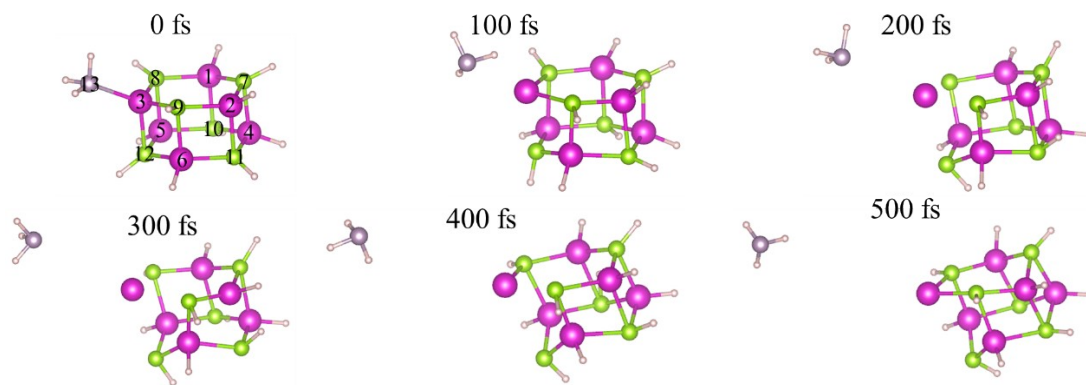

**Fig. S8** Structure variations in  $(\text{CdSe})_6\text{-PH}_3$  after electron injection as a function of time.

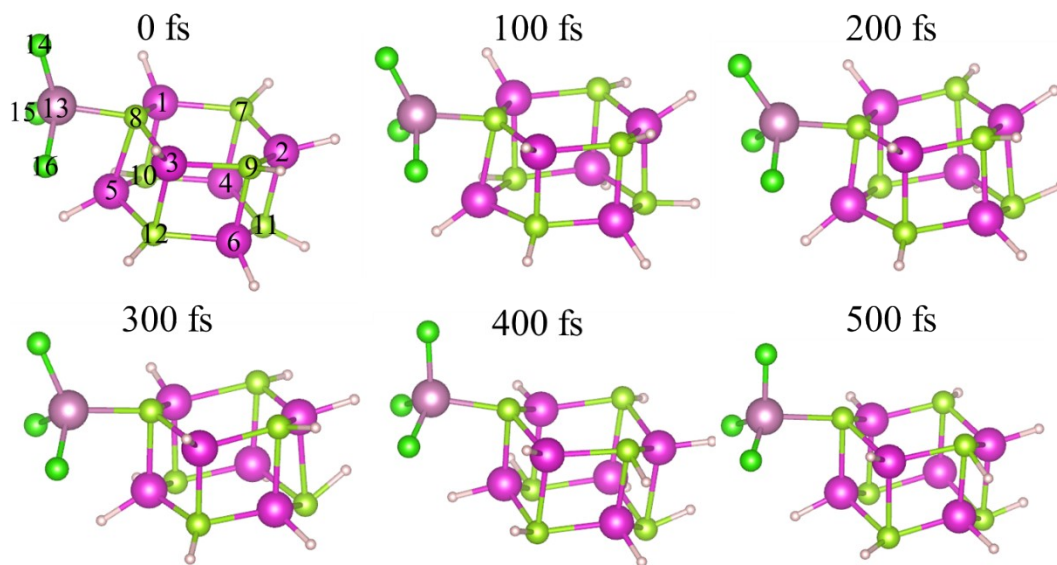

**Fig. S9** Structure variations in  $(\text{CdSe})_6\text{-InCl}_3$  after electron injection as a function of time.

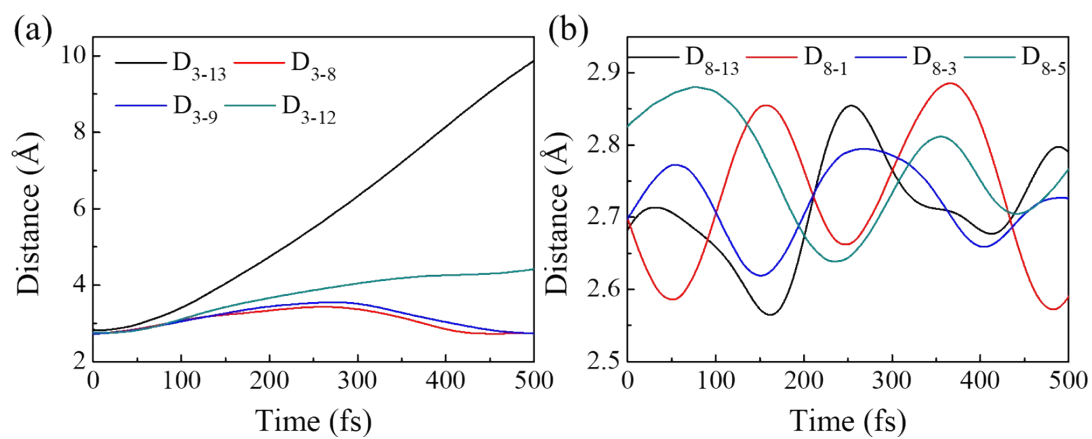

**Fig. S10** Variation of selected bond lengths in (a)  $(\text{CdSe})_6\text{-PH}_3$  and (b)  $(\text{CdSe})_6\text{-InCl}_3$  as a function of time.

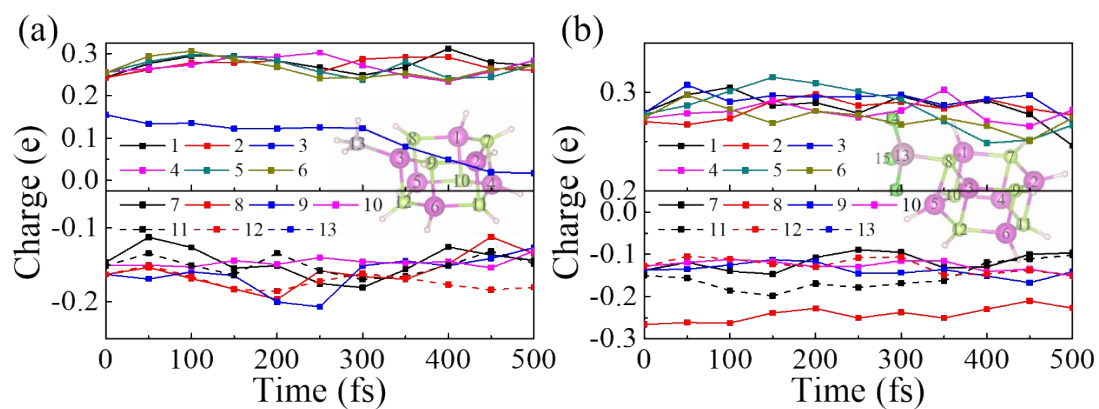

**Fig. S11** Changes of atomic net charge for Cd (top) and Se/P/In (bottom) atoms in (a)  $(\text{CdSe})_6\text{-PH}_3$  and (b)  $(\text{CdSe})_6\text{-InCl}_3$  with time after electron injection.

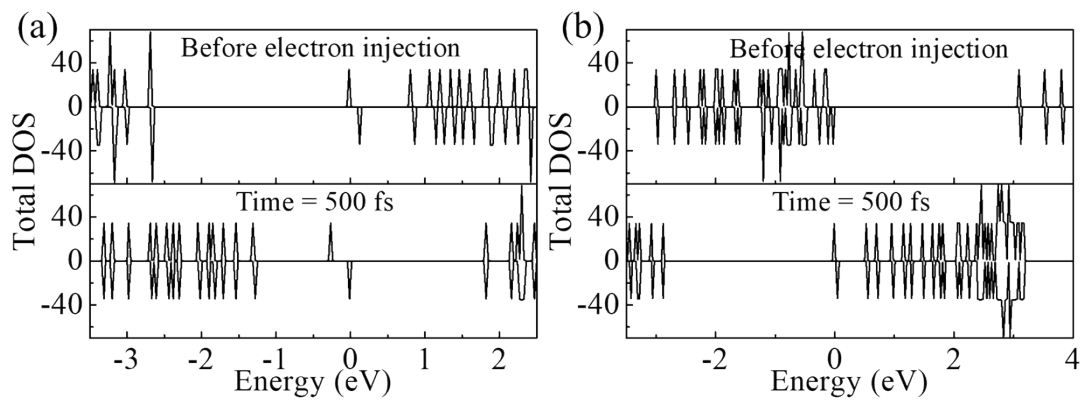

**Fig. 12** Total DOS of (a)  $(\text{CdSe})_6\text{-PH}_3$  and (b)  $(\text{CdSe})_6\text{-InCl}_3$  before and after electron injection. The Fermi level is set to 0 eV.

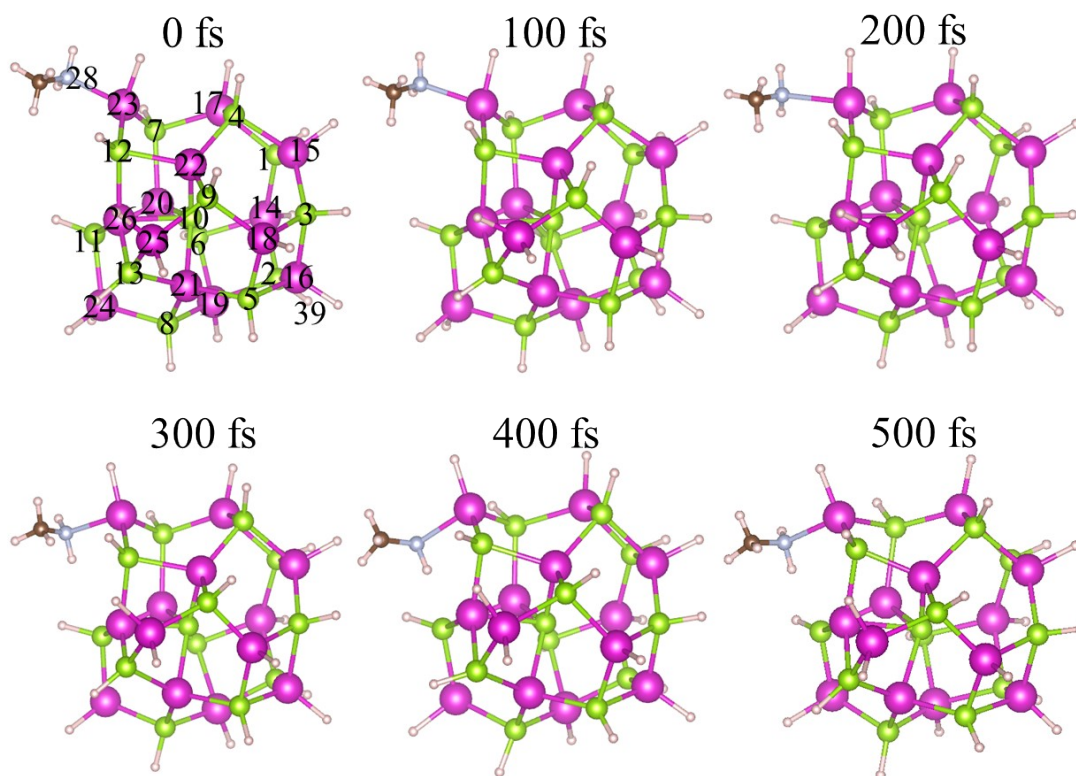

**Fig. S13** Structure variations in (CdSe)<sub>13</sub>-NH<sub>2</sub>CH<sub>3</sub> after electron injection as a function of time.

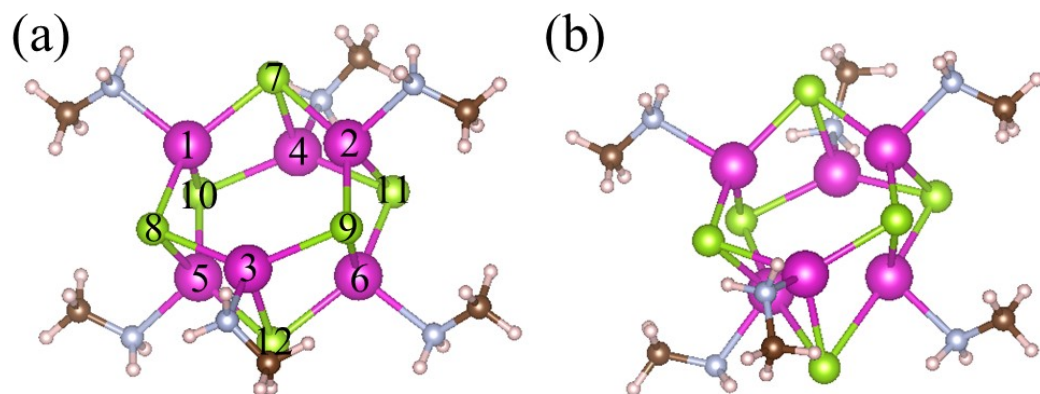

**Fig. S14** Optimized structure of  $(\text{CdSe})_6\text{-}6\text{NH}_2\text{CH}_3$  (a) before and (b) after electron injection.



## References

- 1 J. Singh, R. Thareja, P. Malik and R. Kakkar, *J. Nanopart. Res.*, 2022, **24**, 33.
- 2 J. Sun, X. Zheng, H. He, X. Chen, B. Dong and R. Fei, *J. Mol. Struct.*, 2016, **1114**, 123-131.
- 3 R. Jose, N. U. Zhanpeisov, H. Fukumura, Y. Baba and M. Ishikawa, *J. Am. Chem. Soc.*, 2006, **128**, 629-636.
